# Supplementary material
Source: PubMed Central journal article supplement (PMC9365269)
Supplement: NIHMS1809649-supplement-1.pdf [file NIHMS1809649-supplement-1.pdf]

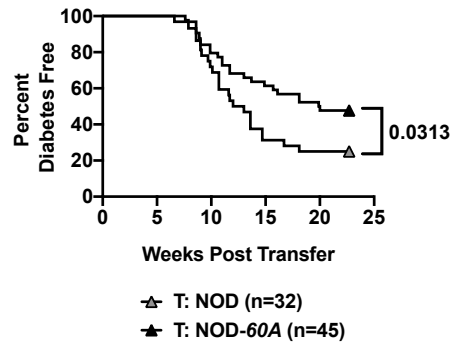

**Supplemental Figure 1. T-cells from NOD-60A mice transfer disease to NOD.scid recipients at only a marginally lower rate than those from NOD controls.** Purified splenic T-cells ( $5 \times 10^6$ ) from NOD or NOD-60A female donors were transferred into female NOD.scid recipients then monitored for T1D onset by weekly urine testing. Survival curve comparisons were analyzed by log-rank (Mantel-Cox) test.
